1 **Dengue Viremia Kinetics and Effects on Platelet Count and Clinical Outcomes: An Analysis of 2340**  
2 **Patients from Vietnam**

3 **Running title:** Dengue viremia kinetics and effects on outcomes

4 Nguyen Lam Vuong<sup>1,2\*</sup>, Nguyen Than Ha Quyen<sup>1</sup>, Nguyen Thi Hanh Tien<sup>1</sup>, Duong Thi Hue Kien<sup>1</sup>, Huynh  
5 Thi Le Duyen<sup>1</sup>, Phung Khanh Lam<sup>1,2</sup>, Dong Thi Hoai Tam<sup>1</sup>, Tran Van Ngoc<sup>3</sup>, Thomas Jaenisch<sup>4,5</sup>, Cameron  
6 P. Simmons<sup>6,7</sup>, Sophie Yacoub<sup>1,6</sup>, Bridget A. Wills<sup>1,6</sup>, Ronald B. Geskus<sup>1,6\*</sup>

7 **Affiliations:**

- 8 1. Oxford University Clinical Research Unit, Ho Chi Minh City, Viet Nam  
9 2. University of Medicine and Pharmacy at Ho Chi Minh City, Ho Chi Minh City, Viet Nam  
10 3. Hospital for Tropical Diseases, Ho Chi Minh city, Viet Nam  
11 4. Center for Global Health, Colorado School of Public Health, Aurora, CO, USA  
12 5. Heidelberg Institute of Global Health (HIGH), Heidelberg University Hospital, Germany  
13 6. Centre for Tropical Medicine and Global health, Nuffield Department of Clinical Medicine,  
14 University of Oxford, United Kingdom  
15 7. World Mosquito Program, Monash University, Clayton, Australia

16 **\*Correspondence to:**

17 Dr. Nguyen Lam Vuong (email: [vuongnl@oucru.org](mailto:vuongnl@oucru.org)) or Dr. Ronald B. Geskus (email: [rgeskus@oucru.org](mailto:rgeskus@oucru.org)),  
18 Oxford University Clinical Research Unit, Wellcome Trust Africa and Asia Programme, 764 Vo Van Kiet  
19 Street, Ward 1, District 5, Ho Chi Minh City, Viet Nam. Telephone: +84 28 39237954 (Ext. 106).

20

21 **Abstract**

22 **Background:** Viremia is a critical factor in understanding the pathogenesis of dengue infection, but  
23 limited data exist on viremia kinetics. This study aimed to investigate the kinetics of viremia and its  
24 effects on subsequent platelet count, severe dengue, and plasma leakage.

25 **Methods:** We pooled data from three studies conducted in Vietnam between 2000 and 2016, involving  
26 2340 dengue patients with daily viremia measurements and platelet counts after symptom onset.  
27 Viremia kinetics were assessed using a random effects model that accounted for left-censored data. The  
28 effects of viremia on subsequent platelet count and clinical outcomes were examined using a landmark  
29 approach with a random effects model and logistic regression model with generalized estimating  
30 equations, respectively.

31 **Results:** Viremia levels rapidly decreased following symptom onset, with variations observed depending  
32 on the infecting serotype. DENV-1 exhibited the highest mean viremia levels during the first 5-6 days,  
33 while DENV-4 demonstrated the shortest clearance time. Higher viremia levels were associated with  
34 decreased subsequent platelet counts from day 6 onwards. Elevated viremia levels on each illness day  
35 increased the risk of developing severe dengue and plasma leakage. However, the effect size decreased  
36 with later illness days.

37 **Conclusions:** This study provides comprehensive insights into viremia kinetics and its effect on  
38 subsequent platelet count and clinical outcomes in dengue patients. Our findings underscore the  
39 importance of measuring viremia levels during the early febrile phase for dengue studies and clinical  
40 practice.

41 **Keywords:** Dengue; Viremia; Platelet; Severe dengue; Plasma leakage

42

## 43 Introduction

44 Dengue is the most common arboviral infection worldwide and is found mainly in tropical and  
45 subtropical areas. The disease has been a growing threat for decades, and in 2019 the World Health  
46 Organization (WHO) ranked it among the top 10 threats to global health (World Health Organization,  
47 2020). It is estimated that 105 million people are infected by dengue annually, of whom half develop  
48 symptoms (Cattarino, Rodriguez-Barraquer, Imai, Cummings, & Ferguson, 2020). Although most  
49 infections are asymptomatic or self-limiting, the small proportion of patients who develop complications  
50 can still overwhelm health systems in dengue-endemic countries during seasonal epidemics. Climate  
51 change, increasing global travel, and urbanization all serve to amplify the distribution of *Aedes aegypti*,  
52 the main vector responsible for dengue transmission (Whitehorn & Yacoub, 2019; Yacoub, Kotit, &  
53 Yacoub, 2011). Although dengue has been known for centuries, specific treatment is still to be found,  
54 and the two licensed vaccines are of limited benefit (Kariyawasam, Lachman, Mansuri, Chakrabarti, &  
55 Boggild, 2023; Redoni et al., 2020).

56 Plasma viremia is associated with dengue disease severity (Vuong et al., 2021). Exploring the variation in  
57 viremia levels could help improve our understanding of disease pathogenesis and potentially facilitate  
58 assessment of new vaccines and treatments for dengue. For example, knowing the natural kinetics of  
59 dengue viremia may help in selection of patient groups or timing of antiviral use in therapeutic  
60 intervention trials. Dengue viremia kinetics has been investigated in several studies (Ben-Shachar,  
61 Schmidler, & Koelle, 2016; Clapham et al., 2016; Clapham, Tricou, Van Vinh Chau, Simmons, & Ferguson,  
62 2014; Duyen et al., 2011; Matangkasombut et al., 2020; Nguyet et al., 2013; Simmons, Chau, et al., 2007;  
63 Tricou, Minh, Farrar, Tran, & Simmons, 2011). The main findings are: (i) viremia rapidly decreases after  
64 symptom onset; (ii) dengue virus (DENV)-1 infection gives higher viremia level than DENV-2 and 3; and  
65 (iii) primary infection gives higher viremia than secondary infection in DENV-1. However, these studies  
66 had limited sample sizes, particularly for DENV-4 serotype, and did not provide a full account of viremia  
67 kinetics. Three studies constructed mechanistic mathematical models and focused on investigating the  
68 role of the host immune response in controlling viremia (Ben-Shachar et al., 2016; Clapham et al., 2016;  
69 Clapham et al., 2014). Another study assessed viremia in infants aged under 18 months (Simmons, Chau,  
70 et al., 2007); the findings cannot be generalized to older children or adults. Others focused on peak  
71 viremia level after symptom onset, time to viral clearance and/or the probability of detecting virus on  
72 each illness day (Duyen et al., 2011; Matangkasombut et al., 2020; Nguyet et al., 2013; Tricou et al.,

73 2011). In most analyses, viremia levels below the limit of detection were simply set as zero, which may  
74 not be appropriate.

75 Quantifying the effect of viremia level on clinical outcomes is important to understand the mechanisms  
76 leading to severe disease. We and others have previously found that higher viremia levels are associated  
77 with more severe dengue (Duyen et al., 2011; Endy et al., 2004; Morsy et al., 2020; Tang et al., 2010;  
78 Tricou et al., 2011; Vaughn et al., 2000; Vuong et al., 2021). However, all analyses were based on a single  
79 viremia value per individual. Investigating how individual viremia levels at different times after symptom  
80 onset affect the risk of severe outcome potentially provides new insights into pathogenic mechanisms.  
81 In addition, the relationship between viremia kinetics and platelet count kinetics – an important  
82 hematological indicator – has yet to be investigated.

83 This study aims to improve our understanding of viremia kinetics, how it is associated with patient  
84 characteristics and virus serotype, and how it impacts disease severity, using a dataset derived from  
85 several thousand individuals with symptomatic dengue. First, we fitted a model for individual viremia  
86 kinetics that treats values below the detection limit as censored data, and assessed whether viremia  
87 kinetics differed by age, sex, serotype, or immune status. Second, we modeled platelet count kinetics  
88 and explored dependence on viremia level. We investigated the potential existence of a lagged effect of  
89 viremia, by analyzing platelet counts measured on and following the day of viremia assessment. Third,  
90 we modeled the effect of viremia levels, measured at different days after symptom onset, on  
91 development of two clinical outcomes, plasma leakage and severe dengue.

92

## 93 **Methods**

### 94 ***Study population***

95 We used data from three prospective observational studies performed as part of the longstanding  
96 collaboration between the Oxford University Clinical Research Unit (OUCRU) and the Hospital for  
97 Tropical Diseases (HTD) in Ho Chi Minh City, Vietnam. Protocol synopses for the three studies are  
98 presented in **Appendix 1**. Briefly, studies A and B simultaneously ran from 2000 to 2009 and enrolled  
99 children aged between 5 and 15 years. Study A included children with a febrile illness presenting to  
100 community outpatient clinics, while study B included children admitted to HTD with a febrile illness  
101 suspected to be dengue. Some patients from study A were subsequently enrolled in study B after  
102 admission to hospital. Study C ran from 2011 to 2016 and enrolled adults and children presenting with

103 possible dengue within three days of fever onset (IDAMS study, NCT01550016) (Jaenisch et al., 2016).  
104 Clinical evaluation and blood sampling were performed daily for all three studies. All studies were  
105 approved by the Oxford Tropical Research Ethics Committee and the Institutional Ethics Committee.

106 We identified 3527 laboratory-confirmed dengue patients. Among them, 2340 had relevant data on  
107 viremia kinetics and were included in this analysis (**Figure 1**). Details of dengue diagnostics are in  
108 **Appendix 2**.

109 **Figure 1. Flowchart illustrating the process of patient selection**

110

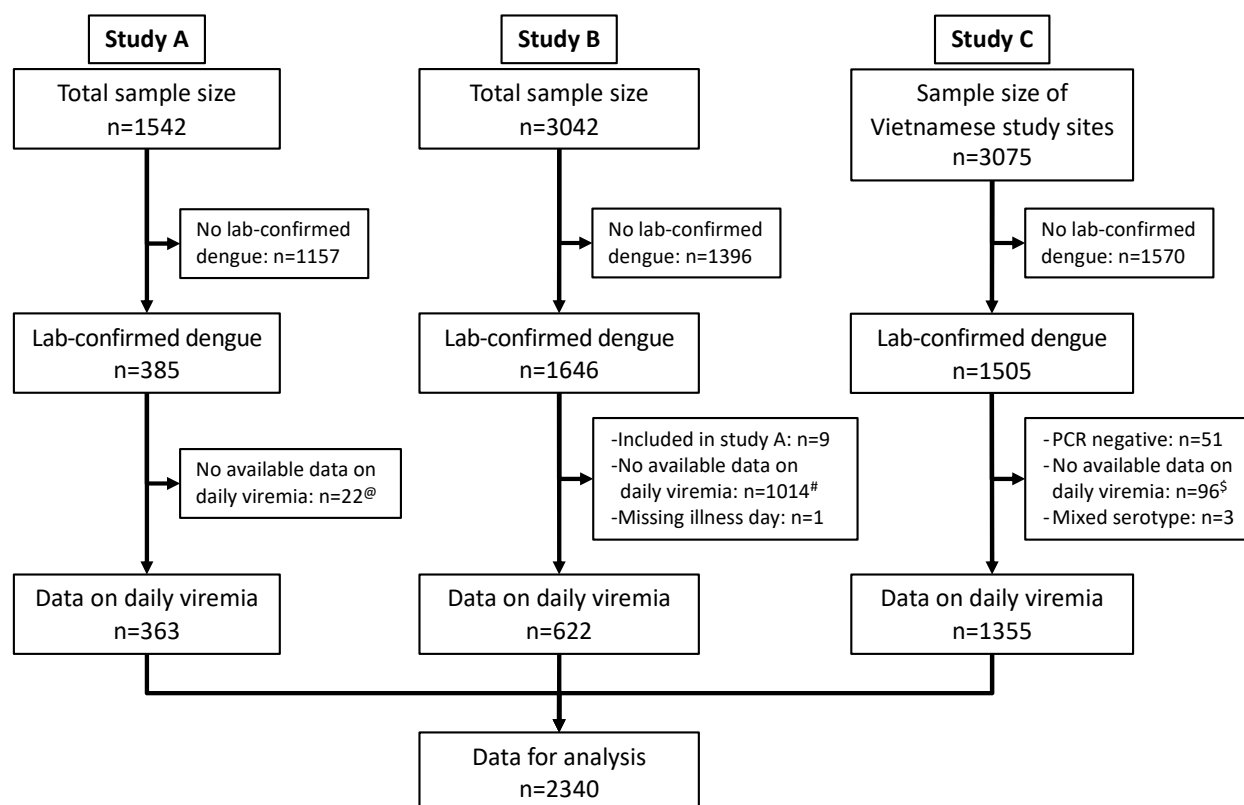

111  
112

113 @Twenty-two patients in study A lacked viremia data; however, they were subsequently enrolled in study B after  
114 hospitalization and had daily viremia measurements.

115 #Although study B spanned from 2000 to 2009, daily viremia levels were only measured between 2006 and 2008.

116 §In study C, one study site in Vietnam did not have daily viremia measurements.

117 Overall, a random sample of 2340 from 3527 laboratory-confirmed dengue patients had data on viremia kinetics.  
118 PCR, polymerase chain reaction.

### 119 ***Plasma viremia measurement and clinical endpoints (details in Appendix 2)***

120 Plasma viremia levels were measured by reverse transcription polymerase chain reaction (RT-PCR),  
121 which was an internally controlled, serotype-specific, real-time, two-step assay in studies A and B  
122 (Simmons, Popper, et al., 2007), and a one-step procedure using a validated assay in study C (Hue et al.,

123 2011). There was no formal validation of the detection limit for viremia for the two-step PCR used in  
124 studies A and B; we set it at 1000 copies/ml. In the one-step PCR used in study C, the detection limit was  
125 300 copies/ml for DENV-1 and DENV-3, 60 copies/ml for DENV-2, and 600 copies/ml for DENV-4 (Hue et  
126 al., 2011). Patients were classified into probable primary (i.e., the first) or probable secondary (i.e., a  
127 second or subsequent) infection based on IgG results on paired samples.

128 For the clinical endpoints we selected severe dengue and plasma leakage. The definitions are based on  
129 the WHO 2009 guidelines (World Health Organization, 2009) and standard endpoint definitions for  
130 dengue trials (Tomashek et al., 2018). Severe dengue was defined as severe plasma leakage, severe  
131 bleeding, and/or severe organ impairment. Plasma leakage included moderate and severe leakage.

### 132 ***Statistical analysis (details in Appendix 3)***

133 In **Appendix 3-figure 1** we show a directed acyclic graph (DAG) to display assumptions about the causal  
134 relationships between variables over illness day. Illness day is the number of days after symptom onset,  
135 where day 1 is the day of symptom onset. Potential confounders that needed to be corrected for were  
136 age, sex, DENV serotype, and primary/secondary immune status. In all analyses, we used a log-10  
137 transformation for viremia levels.

138 We modeled viremia kinetics over time and explored dependence on age, sex, serotype, immune status  
139 and PCR method using a linear mixed-effects regression model, allowing for left censored values in the  
140 outcome variable. In the fixed effect, we allowed for interactions between serotype and immune status,  
141 and between illness day and all other covariates. Nonlinear trends by age and illness day were  
142 investigated using splines with three and four knots, respectively. We included a random effect with an  
143 intercept and splines for illness day with four knots to model the intra-person correlation. Due to the  
144 presence of a left-skewed distribution in log-10 viremia (**Appendix 4-figure 1**), a sensitivity analysis was  
145 conducted using the 10th-root transformation.

146 Platelet counts were transformed using a fourth-root transformation since the distribution was right-  
147 skewed (**Appendix 4-figure 2**). The effect of viremia on subsequent platelet count was investigated using  
148 the landmark approach (van Houwelingen & Putter, 2011). For each illness day from 1 to 7, a landmark  
149 dataset was created, which included viremia on that day, platelet count from that day to day 10, and the  
150 time-fixed variables (age, sex, serotype, immune status, and PCR method). For the supermodel that  
151 combined all landmark datasets, we used a linear mixed effects model including viremia, age, sex,  
152 serotype, immune status, PCR method, illness day and landmark. In the fixed effect, we also included  
153 four-way interactions between viremia, serotype, PCR method and a) and immune status, b) illness day,

154 and c) landmark day. Splines with three knots were used to allow for nonlinear trends in log-10 viremia,  
155 age, illness day, and landmark day. We included a random effect with an intercept by the combination  
156 of individuals and landmark, and splines for illness day with three knots.

157 The effect of viremia on clinical endpoints was investigated using a logistic regression model using the  
158 landmark approach (van Houwelingen & Putter, 2011). For each illness day from 1 to 7, a landmark  
159 dataset was created, which included viremia on that day, occurrence of the endpoint on or after that  
160 day, and the time-fixed variables similar to above. All individuals who had already experienced the  
161 relevant endpoint before that day were excluded. We fitted a logistic regression model for each  
162 landmark dataset and then fitted a supermodel that combined all the datasets. For the supermodel we  
163 used generalized estimating equations (GEE) to account for repeated inclusion of individuals at multiple  
164 landmarks. We included viremia, age, sex, serotype, immune status, study, and landmark day, and  
165 allowed for the four-way interaction between viremia, serotype, immune status and landmark day, and  
166 two-way interactions between viremia and all other covariates. Splines were used to allow for nonlinear  
167 trends in log-10 viremia (three knots), age (three knots), and landmark (three knots). Since plasma  
168 leakage had missing data, we performed an analysis with imputed data using multiple imputation by  
169 chained equations (MICE). The imputation was done in our previous study (Vuong et al., 2021).

170 In the analyses for platelet count and clinical outcomes, undetectable viremia levels were set as the  
171 specific detection limits, and a binary dummy variable (yes/no) was created to indicate whether the  
172 viremia value was undetectable. Since the individual spline terms are hard to interpret and the large  
173 data set makes most differences statistically significant, results are primarily reported using plots of  
174 predicted values. All analyses were done using the statistical software R version 4.1.0 (R Core Team,  
175 2021) with 'MCMCglmm' (Hadfield, 2010), 'lme4' (Bates, Maechler, Bolker, & Walker, 2015), 'geepack'  
176 (Halekoh, Højsgaard, & Yan, 2006), and 'rms' (Harrell Jr, 2021) packages for the models.

177

## 178 **Results**

179 Baseline characteristics and outcomes are summarized in **Table 1**. Three quarters of the participants  
180 were children, and male sex predominated (60%). Most patients (85%) were enrolled on illness day 2 or  
181 3. All four serotypes were included, but DENV-1 was the most prevalent (54%). Most infections (69%)  
182 were classified as probable secondary infection, while in 11% immune status could not be determined.  
183 There were 353 patients (15%) with plasma leakage and 65 patients (3%) with severe dengue. In  
184 **Appendix 4-table 1** we summarize plasma leakage and severe dengue by serotype and immune status.

185 DENV-2 had the highest proportion of these two outcomes. Patients with probable secondary infection  
 186 were more likely to experience these outcomes than those with probable primary infection or  
 187 indeterminate immune status, regardless of the infecting serotype.

188 **Table 1. Baseline characteristics and clinical outcomes**

|                               | N <sup>a</sup> | All patients<br>(N=2340) | Study A<br>(N=363) | Study B<br>(N=622) | Study C<br>(N=1355) |
|-------------------------------|----------------|--------------------------|--------------------|--------------------|---------------------|
| Age, years                    | 2340           | 13 (10; 18)              | 12 (9; 14)         | 12 (10; 13)        | 16 (10; 25)         |
| Sex male                      | 2340           | 1403 (60)                | 195 (54)           | 412 (66)           | 796 (59)            |
| Illness day at enrolment      | 2340           |                          |                    |                    |                     |
| 1                             |                | 310 (13)                 | 59 (16)            | 7 (1)              | 244 (18)            |
| 2                             |                | 848 (36)                 | 150 (41)           | 155 (25)           | 543 (40)            |
| 3                             |                | 1137 (49)                | 114 (31)           | 455 (73)           | 568 (42)            |
| 4                             |                | 45 (2)                   | 40 (11)            | 5 (1)              | 0 (0)               |
| Serotype                      | 2340           |                          |                    |                    |                     |
| DENV-1                        |                | 1264 (54)                | 233 (64)           | 410 (66)           | 621 (46)            |
| DENV-2                        |                | 373 (16)                 | 48 (13)            | 130 (21)           | 195 (14)            |
| DENV-3                        |                | 252 (11)                 | 80 (22)            | 82 (13)            | 90 (7)              |
| DENV-4                        |                | 451 (19)                 | 2 (1)              | 0 (0)              | 449 (33)            |
| Immune status                 | 2340           |                          |                    |                    |                     |
| Probable primary              |                | 474 (20)                 | 134 (37)           | 124 (20)           | 216 (16)            |
| Probable secondary            |                | 1619 (69)                | 219 (60)           | 464 (75)           | 936 (69)            |
| Indeterminate                 |                | 247 (11)                 | 10 (3)             | 34 (5)             | 203 (15)            |
| Plasma leakage                | 2288           | 353 (15)                 | 43 (13)            | 177 (29)           | 133 (10)            |
| Missing                       |                | 52                       | 39                 | 13                 | 0                   |
| Illness day of plasma leakage | 327            |                          |                    |                    |                     |
| 3                             |                | 2 (1)                    | 0 (0)              | 0 (0)              | 2 (2)               |
| 4                             |                | 71 (22)                  | 12 (30)            | 35 (23)            | 24 (18)             |
| 5                             |                | 107 (33)                 | 12 (30)            | 50 (32)            | 45 (34)             |
| 6                             |                | 105 (32)                 | 12 (30)            | 49 (32)            | 44 (33)             |
| 7                             |                | 42 (13)                  | 4 (10)             | 20 (13)            | 18 (14)             |
| Missing                       |                | 26                       | 3                  | 23                 | 0                   |
| Severe dengue                 | 2340           | 65 (3)                   | 6 (2)              | 40 (6)             | 19 (1)              |
| Illness day of severe dengue  | 65             |                          |                    |                    |                     |
| 3                             |                | 2 (3)                    | 0 (0)              | 2 (5)              | 0 (0)               |
| 4                             |                | 13 (20)                  | 0 (0)              | 12 (30)            | 1 (5)               |
| 5                             |                | 24 (37)                  | 2 (33)             | 16 (40)            | 6 (32)              |
| 6                             |                | 20 (31)                  | 4 (67)             | 7 (18)             | 9 (47)              |
| 7                             |                | 6 (9)                    | 0 (0)              | 3 (8)              | 3 (16)              |

189 <sup>a</sup> N represents the number of patients with available data (i.e., without missing data).

190 Summary statistics are number of patients (%) or median (25<sup>th</sup>; 75<sup>th</sup> percentiles).

191 DENV, dengue virus

### 192 *Viremia kinetics and the relationship with clinical characteristics*

193 Individual viremia trajectories are shown in **Figure 2**. Most individuals had a decreasing trend from day 1  
 194 or 2 onwards. However, values higher than the baseline value were observed up to day 7 (**Appendix 4-**  
 195 **figure 3**). The decreasing trend was consistent across all combinations of serotype and immune status  
 196 (**Figure 2**).



197 **Figure 2. Individual trajectories of measured viremia levels**

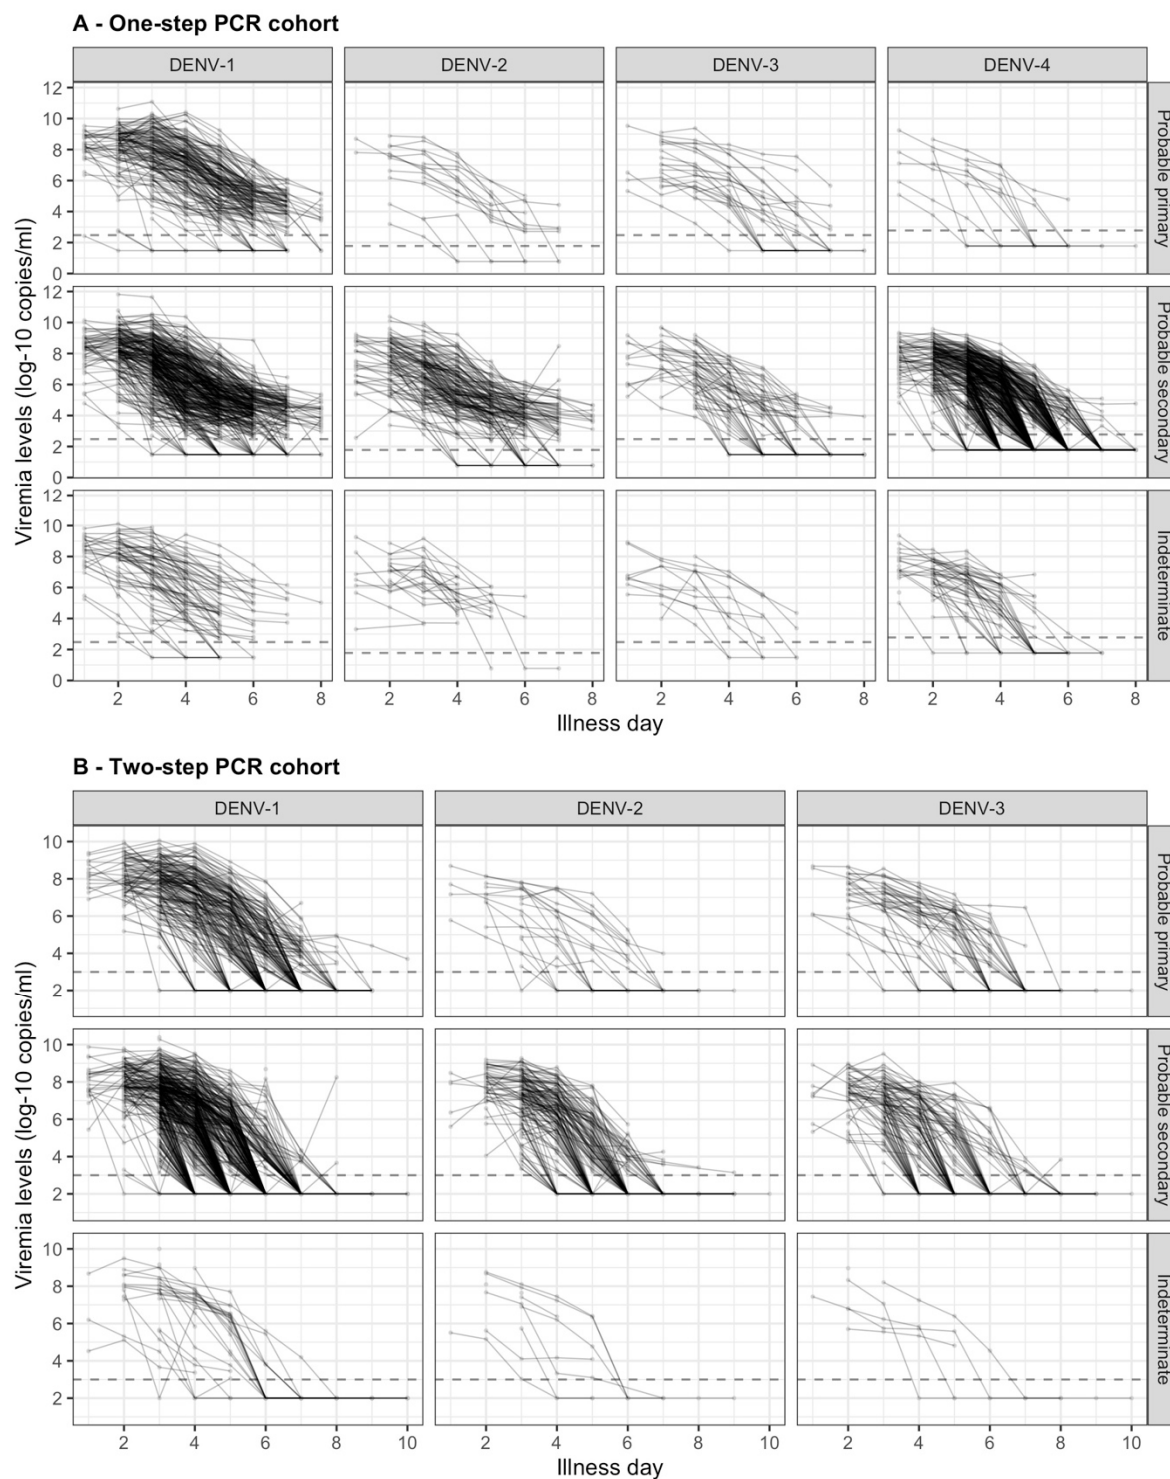

198 The dots represent the measured viremia levels and are connected by lines for each individual patient. The dashed  
199 lines indicate the detection limits, which are 300 copies/ml for DENV-1 and DENV-3, 60 copies/ml for DENV-2, and  
200 600 copies/ml for DENV-4 in the one-step PCR cohort, and 1000 copies/ml in the two-step PCR cohort. 57  
201 measured values that are lower than 1000 copies/ml in the two-step PCR cohort are considered as below the  
202 detection limit. Values below the detection limit are visually represented as 1/10 of the corresponding detection  
203 limit (on the original scale). DENV, dengue virus; PCR, polymerase chain reaction.  
204

205 In **Figure 3** we present the fitted values based on the model for viremia for the one-step PCR cohort. The  
206 mean viremia trajectory differed by serotype. DENV-1 gave the highest viremia levels, with DENV-2 in  
207 secondary infection giving similar levels from day 5 onwards. DENV-2, DENV-3 and DENV-4 had similar  
208 viremia levels during the first three days. However, viremia decreased rapidly in DENV-4, reaching  
209 undetectable levels in the shortest time, while DENV-2 showed the slowest decline. These differences  
210 between serotypes were more pronounced in case of probable primary infection (**Figure 3-A**). In terms  
211 of immune status, probable primary infection showed higher viremia levels compared to probable  
212 secondary infection in DENV-1 from day 3 onwards. The disparity between probable primary and  
213 probable secondary infection was less pronounced in the other serotypes (**Figure 3-B**). Mean viremia  
214 levels were comparable between females and males (**Figure 3-C**), as well as across age (**Figure 3-D**). The  
215 one-step PCR method resulted in longer viremia compared to the two-step PCR (**Appendix 5-figure 1**).  
216 The sensitivity analysis using the 10th-root transformation of viremia gave results similar to the main  
217 analysis using log-10 viremia (**Appendix 5-figure 2**).

218 **Figure 3. Fitted trends in mean viremia levels**

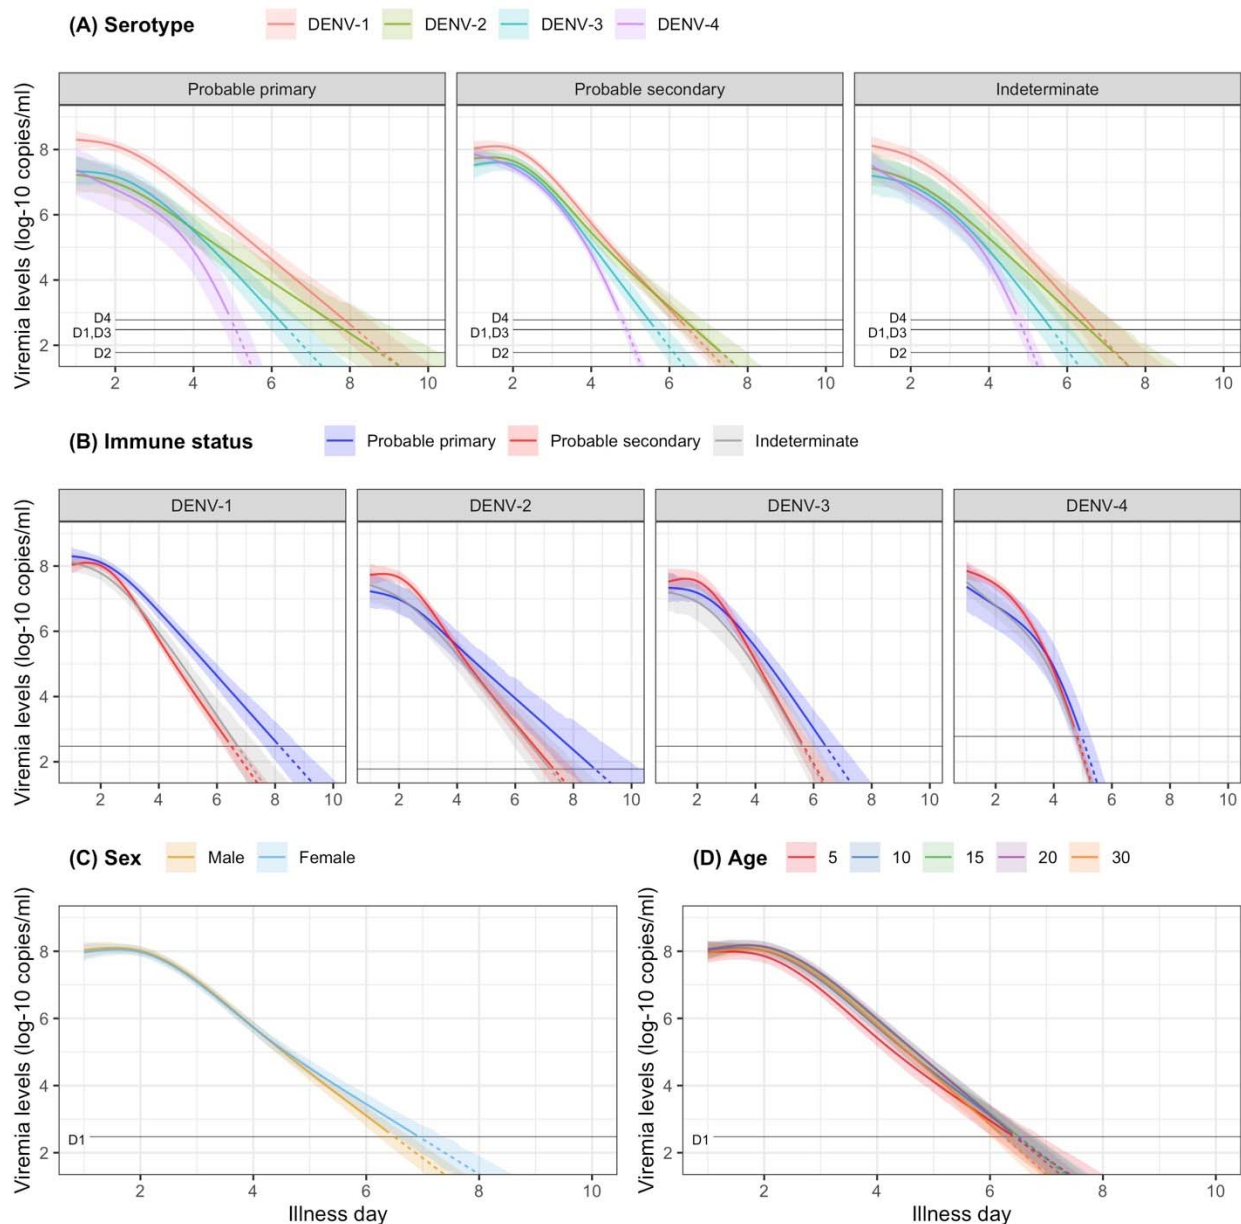

219  
 220 The colored lines represent the estimated mean viremia levels, and the colored shaded regions represent the  
 221 corresponding 95% credible intervals. The horizontal lines represent the detection limits (D1, D2, D3, and D4  
 222 denote DENV-1, DENV-2, DENV-3, and DENV-4, respectively). Dashed lines indicate fitted viremia levels that are  
 223 below the detection limit. Viremia levels are shown for age of 10 years, male sex, serotype DENV-1, probable  
 224 secondary infection, and using the one-step PCR. DENV, dengue virus; PCR, polymerase chain reaction.  
 225

226

227 ***Effect of viremia on subsequent platelet count***

228 **Figure 4** shows the mean platelet counts by viremia levels based on the supermodel for the one-step  
229 PCR method. There was minimal impact of viremia on days 1-5 platelet count. However, higher viremia  
230 levels gave decreased subsequent platelet counts from day 6 onwards, for all serotypes. The strength of  
231 this effect increased with later illness day and was more pronounced in DENV-1 and DENV-2 compared  
232 to DENV-3 and DENV-4. The effect of viremia on subsequent platelet count remained consistent across  
233 subgroups of immune status, sex, and age. In the two-step PCR cohort, the effect of viremia on platelet  
234 count was less pronounced compared to the one-step PCR cohort, although the overall trends were  
235 similar (**Appendix 6-figure 1**).

236 **Figure 4. Fitted trends in mean platelet counts according to viremia levels – results from the supermodel**

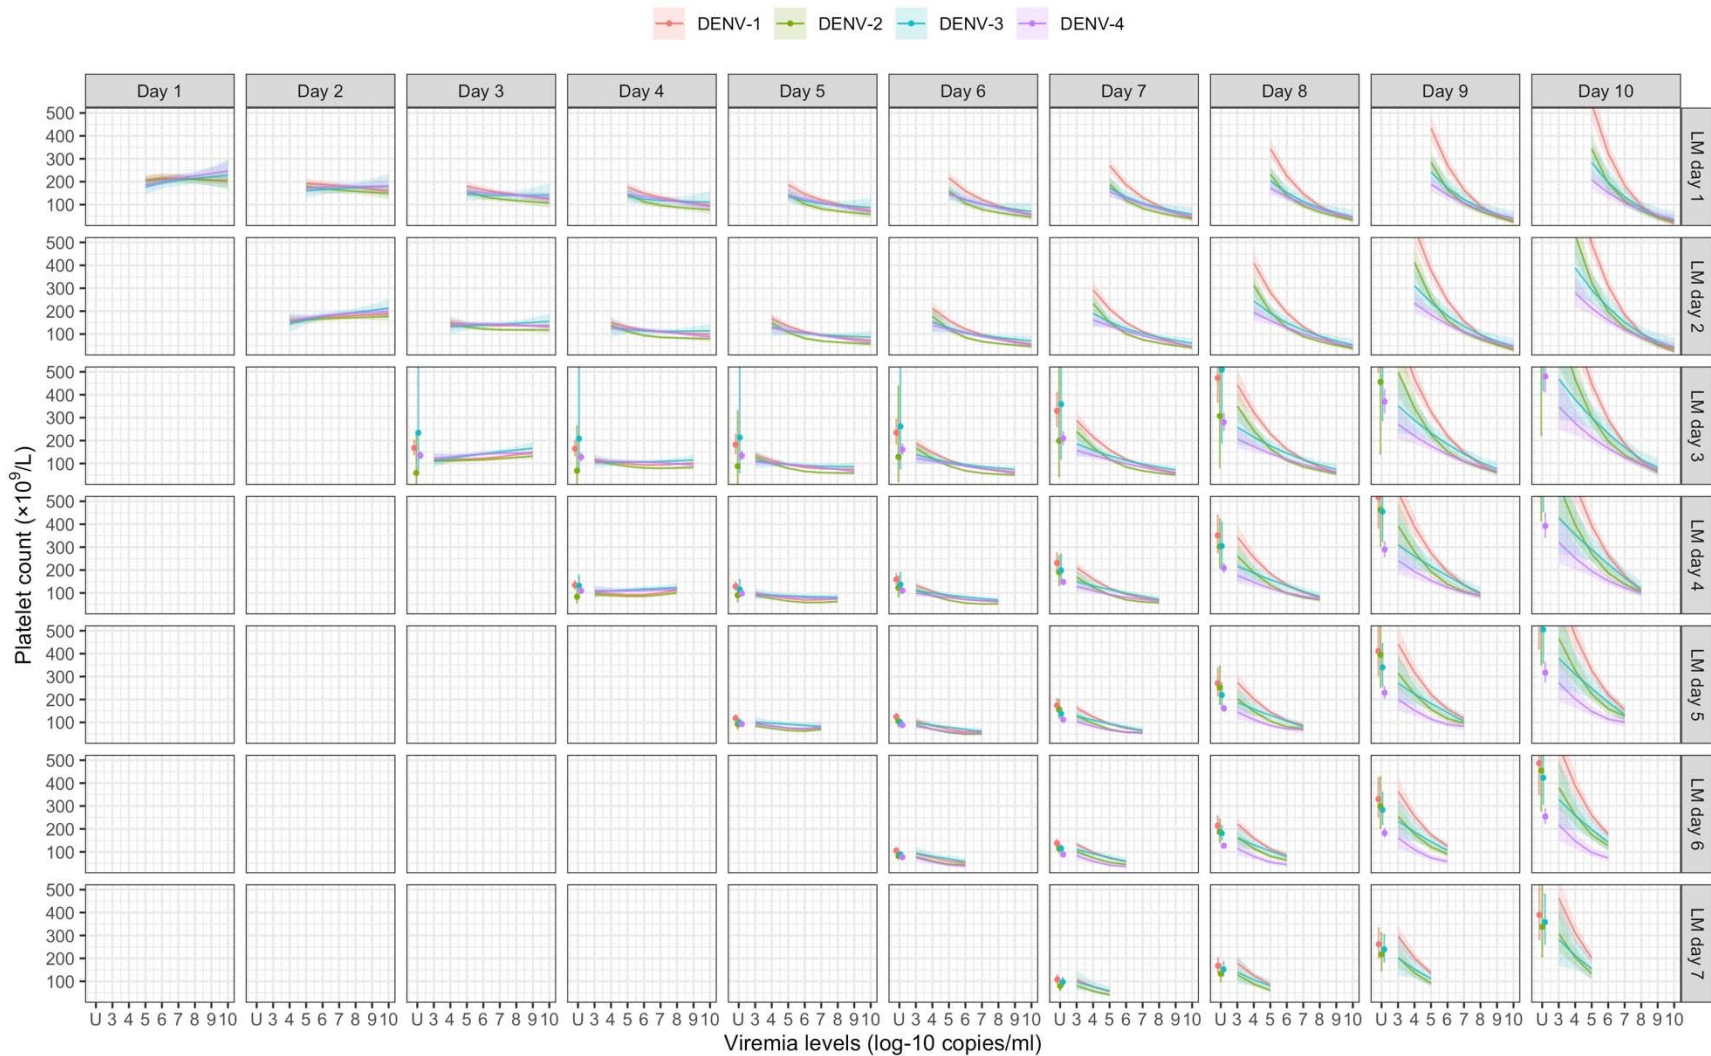

237  
 238 The colored lines or dots represent the estimated mean platelet counts. The colored shaded regions and whiskers indicate the corresponding 95% confidence  
 239 intervals. Each row represents the effect of viremia on a specific day to platelet count from that day to day 10. No fitted trends are made for DENV-4 in LM day  
 240 7 since viremia was undetectable in almost all DENV-4 cases from day 7 onwards. The mean platelet counts are shown for age of 10 years, male sex, probable  
 241 secondary infection, and using the one-step PCR. DENV, dengue virus; LM, landmark; PCR, polymerase chain reaction; U, under the limit of detection.

242 ***Effect of viremia on clinical outcomes***

243 Higher viremia levels increased the risk of severe dengue and plasma leakage for each of the serotypes  
244 (**Figure 5**). The effect of viremia on both endpoints decreased with later landmark day of viremia  
245 measurement, particularly for severe dengue (**Appendix 7-table 1**). However, these trends were not  
246 clear in the results obtained from the simple logistic regression models at each landmark time point  
247 (**Appendix 7-figure 1**). This trend remained consistent across subgroups of sex, age, and study  
248 (**Appendix 7-figure 2**). Furthermore, the results were consistent between the analyses with and without  
249 imputation (**Figure 5**).

250 The supermodel revealed that older individuals had a relatively lower risk of developing severe dengue,  
251 but the trend was not significant. Males exhibited a slightly higher risk of severe dengue compared to  
252 females. The effect of serotype on the two endpoints was dependent on immune status. Individuals with  
253 probable secondary infection had a higher risk of experiencing both endpoints compared to those with  
254 probable primary infection (**Appendix 7-figure 3**).

255 **Figure 5. Probability of occurrence of the two clinical endpoints according to viremia levels –**  
 256 **results from the supermodel**

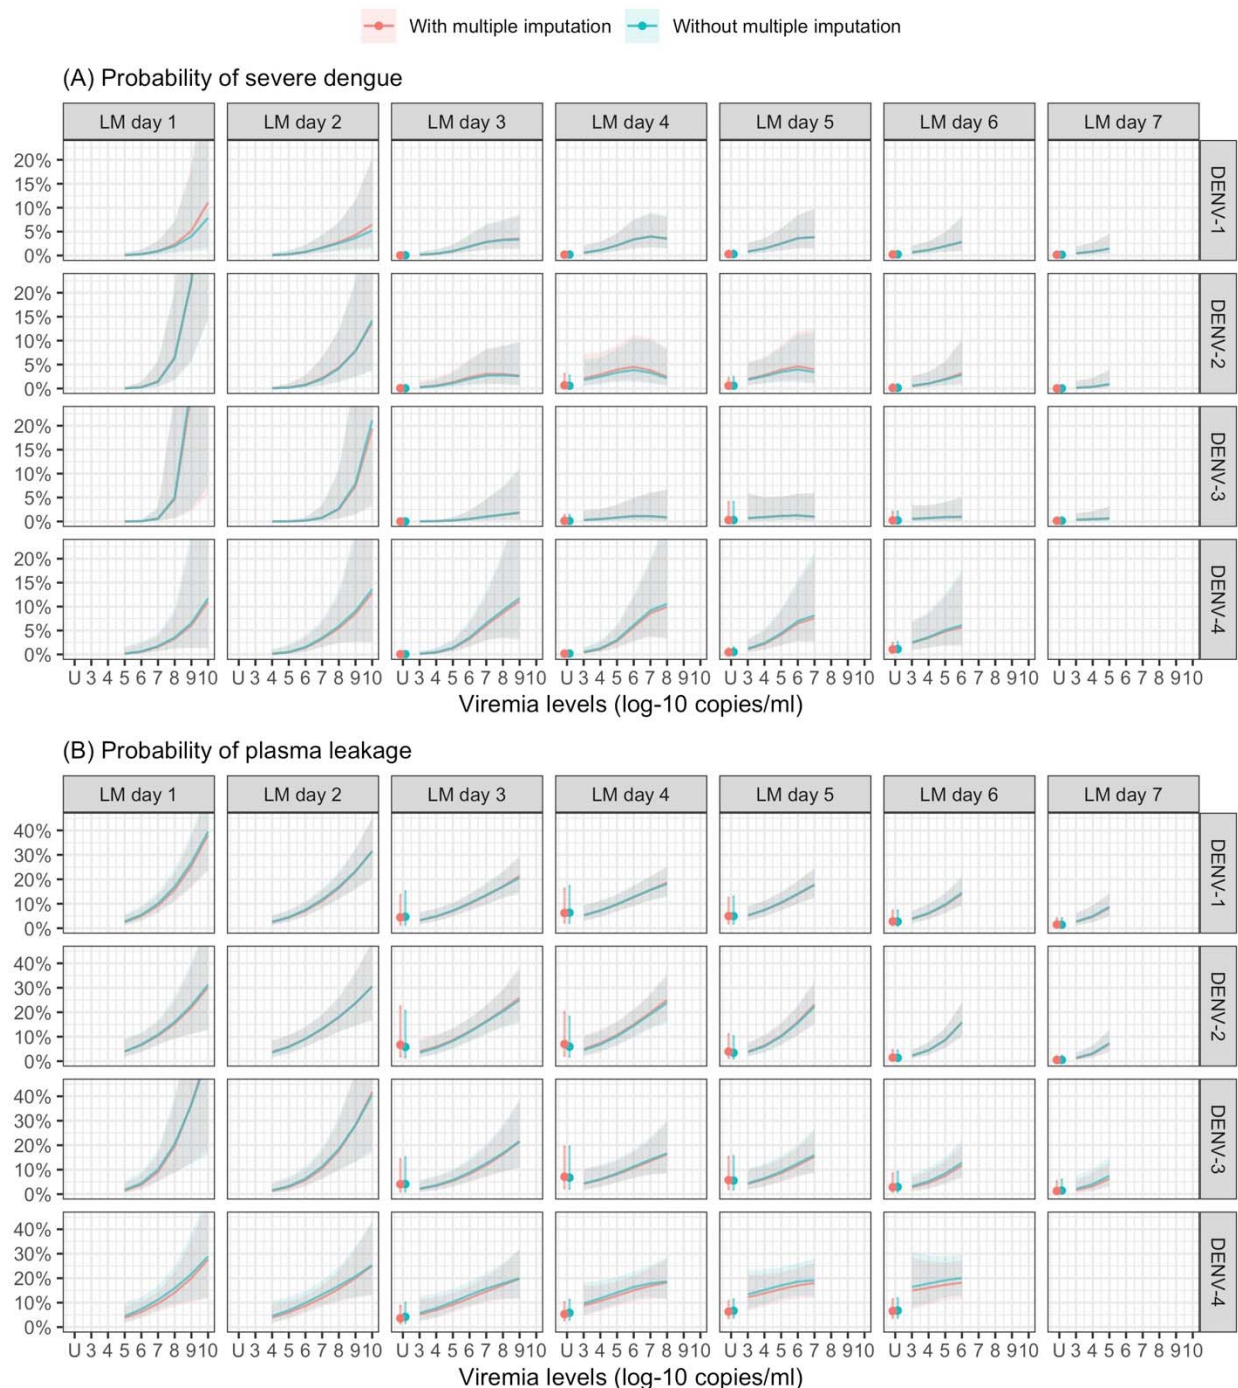

257 The colored lines or dots represent the probability of the endpoints. The colored shaded regions and whiskers  
 258 indicate the corresponding 95% confidence intervals. Each column represents the effect of viremia on a specific  
 259 day. No fitted trends are made for DENV-4 in LM day 7 since viremia was undetectable in almost all DENV-4 cases  
 260 from day 7 onwards. The probabilities are shown for age of 10 years, male sex, probable secondary infection, and  
 261 from Study C. DENV, dengue virus, LM, landmark; PCR, polymerase chain reaction; U, under the limit of detection.  
 262  
 263

## 264 Discussion

265 In this study, we conducted a comprehensive analysis using a large dataset of 2340 viremic dengue  
266 patients to examine viremia kinetics from first presentation, its association with various virus and  
267 patient characteristics, and its impact on subsequent platelet count and disease severity. As others have  
268 described, we found that plasma viremia declines rapidly following the onset of symptoms, with the  
269 kinetics primarily influenced by the specific infecting serotype. Moreover, higher viremia levels were  
270 associated with a decrease in subsequent platelet count from day 6 onwards. Elevated viremia levels  
271 were found to increase the risk of developing severe dengue and plasma leakage, with the effect  
272 becoming weaker at later days. The effects of viremia on platelet count and clinical outcomes did not  
273 differ much by different subgroups of serotype, immune status, age, and sex.

274 There is a limited number of published papers that studied the individual trajectory of dengue viremia.  
275 Most used data from Vietnam (Ben-Shachar et al., 2016; Clapham et al., 2016; Clapham et al., 2014;  
276 Duyen et al., 2011; Nguyet et al., 2013; Simmons, Chau, et al., 2007; Tricou et al., 2011), while one was  
277 from Thailand (Matangkasombut et al., 2020). Our study has provided further evidence supporting  
278 previous findings. We confirmed that (i) viremia rapidly decreases following the onset of symptoms, (ii)  
279 DENV-1 exhibits higher viremia levels and a longer duration of detectability compared to DENV-2 and  
280 DENV-3, and (iii) primary infection is associated with higher and more prolonged detectable viremia  
281 than secondary infection in DENV-1, while this pattern was not consistent across other serotypes. We  
282 have added viremia kinetics of DENV-4, and showed that viremia levels declined more rapidly than the  
283 other serotypes. Furthermore, our study demonstrated that the new PCR test has the ability to detect  
284 plasma viremia for a longer period compared to the older test. This may be attributed to the lower  
285 detection limits of the new test. Explaining the differences in viremia kinetics between serotypes  
286 remains challenging, as the molecular factors of the virus that influence plasma viremia levels are still  
287 unknown. It is also important to note that our study focused on the time since symptom onset rather  
288 than the time since infection. We cannot rule out that some of the observed differences are explained  
289 by a difference in time from infection to symptom onset.

290 Our study suggests that higher viremia levels on any day before day 6 are associated with reduced  
291 platelet count on days 6-8, typically corresponding to the nadir of platelet count. Additionally, it is  
292 possible that viremia in the initial four days after symptom onset could affect platelet count with a delay  
293 of 3-4 days. The direct involvement of the dengue virus in triggering platelet activation and apoptosis  
294 can contribute to the development of thrombocytopenia. Thrombocytopenia in dengue infection is



295 thought to occur through two mechanisms: bone marrow suppression, which reduces thrombopoiesis,  
296 and increased peripheral platelet clearance (Quirino-Teixeira, Andrade, Pinheiro, Rozini, & Hottz, 2021).  
297 Various processes contribute to these mechanisms, including platelet-leukocyte and platelet-endothelial  
298 cell interactions, phagocytosis, complement-mediated lysis, aggregation, and clot formation.  
299 Additionally, several host immune response factors are involved in platelet activation (Balakrishna Pillai,  
300 Chu, Mariappan, & JeanPierre, 2021). In our analysis, we considered interactions between viremia level  
301 and both serotype as well as immune status. Interestingly, we observed that the effect of viremia level  
302 on subsequent platelet count did not differ much by serotype and immune status.

303 Higher plasma viremia levels increase the risk of worse clinical outcomes, as demonstrated in our  
304 previous study that only utilised viremia at enrollment during the febrile phase (Vuong et al., 2021). The  
305 diminishing impact of viremia on the two endpoints on later illness days may be attributed to the  
306 heightened immune responses that are likely triggered by higher viremia levels, and the resulting  
307 complex interplay between these factors that underlies progression to severe dengue. The effects of  
308 viremia, age, serotype, immune status, and illness day on the clinical endpoints in this study are  
309 consistent with those observed in the previous study. The similarity between these two analyses, along  
310 with the weaker effect of viremia at later days, suggests that viremia levels around the time of symptom  
311 onset could serve as a reliable predictor of dengue severity. It suggests that the early febrile phase,  
312 specifically illness day 1-3, is the critical period of measuring viremia levels in clinical practice and  
313 dengue studies. Secondary infection remains a substantial risk factor for more severe outcomes, while  
314 viremia kinetics are not influenced much by immune status. These findings suggest that immune status  
315 and viremia may be independent predictors of clinical outcomes, following distinct pathways.

316 The landmark approach enabled us to investigate the effect of viremia on platelet count and the clinical  
317 endpoints at each illness day, ranging from day 1 to 7, while ensuring that the viremia measurements  
318 preceded the occurrence of the outcomes. The supermodel allows for investigation of trends of the  
319 effects, while gaining power because we assume the effects of some fixed factors (e.g., age and sex) to  
320 remain constant over time. There might be other potential confounders such as host genetic and  
321 immune response factors, but these data were not available. Moreover, we assumed that the relation  
322 between viremia level and platelet count was one-way: viremia level affects platelet count. Whether  
323 platelet count affects viremia is unknown.

324 A notable strength of our study is the utilization of a large pooled dataset, which allowed for a flexible  
325 modeling approach to investigate the influence of age, sex, serotype, and immune status, as well as

326 their interactions and nonlinear trends. The use of a model that accounts for left-censored data was  
327 needed for capturing the distribution of viremia levels, considering the significant proportion of  
328 undetectable values observed.

329 The study has several limitations. Firstly, the study only included patients from Vietnam, which may  
330 restrict the generalisability of the findings to other countries and regions. Secondly, our study assessed  
331 viral RNA in the plasma, including both viable and non-viable viral particles, which could potentially lead  
332 to an overestimation of the infectious viral particles in the blood. Lastly, data during the incubation  
333 period were unavailable as patients are typically not diagnosed with dengue until symptom onset.  
334 Therefore, the trajectory of viremia from the time of infection onwards could not be demonstrated, and  
335 symptom onset was used as the reference point instead of infection. This could potentially lead to an  
336 inaccurate interpretation of the results if the incubation period is influenced by the same factors that we  
337 included in our analyses. For example, in cases of secondary infection, the immune response is stronger  
338 and quicker than in primary infection. This might lead to a shorter duration between infection and  
339 symptom onset, as well as faster viral clearance.

340 In conclusion, our findings reveal that viremia levels exhibit a rapid decline shortly after symptom onset,  
341 becoming undetectable after approximately one week in the majority of patients. Viremia kinetics  
342 display variations depending on the infecting serotype. Higher viremia levels are associated with a  
343 subsequent reduction in platelet count on illness days 6-8, and an increased risk of experiencing more  
344 severe clinical outcomes. Viremia serves as an important predictor of dengue outcomes, independent of  
345 the host immune status. However, when considering our previous analysis that involved single early  
346 viremia measurements, the addition of daily viremia measurements may not enhance the prediction of  
347 worse clinical outcomes. Thus, the measurement of viremia levels during the early febrile phase is an  
348 important marker for clinical practice and dengue-related research.

349 **Acknowledgements**

350 We thank the staff from the Dengue group at the Oxford University Clinical Research Unit, Hospital for  
351 Tropical Diseases at Ho Chi Minh City (Vietnam) and the many hospitals and clinics who recruited and  
352 followed patients in the three studies. We gratefully acknowledge the patients and their relatives for  
353 participating in these studies.

354

355 **Additional information**

356 ***Competing interests***

357 Thomas Jaenisch: reports receiving personal fees as members of the Roche Pharmaceuticals Advisory  
358 Board on Severe Dengue, outside the submitted work.

359 Sophie Yacoub: reports receiving personal honorarium for attending the Novartis dengue drug ad board  
360 meeting and Takeda dengue education symposium, outside the submitted work.

361 Bridget Wills: reports receiving personal fees a) as a member of the Roche Advisory Board on Severe  
362 Dengue and b) as a member of the Data Monitoring and Adjudication Committees for the Takeda  
363 dengue vaccine trials, both outside the remit of the submitted work.

364 The other authors declare that no competing interests exist.

365 ***Funding***

| <b>Funder</b>                              | <b>Grant reference number</b>                   | <b>Author</b>                     |
|--------------------------------------------|-------------------------------------------------|-----------------------------------|
| Wellcome Trust                             | 084368/Z/07/Z                                   | Cameron P. Simmons                |
| Wellcome Trust                             | 077078/Z/05/Z<br>077078/Z/05/A<br>089276/B/09/Z | Bridget A. Wills                  |
| European Union Seventh Framework Programme | FP7-281803 IDAMS                                | Thomas Jaenisch                   |
| Wellcome Trust                             | 106680/Z/14/Z                                   | Ronald B. Geskus<br>Sophie Yacoub |
| Wellcome Trust                             | 225167/Z/22/Z                                   | Ronald B. Geskus<br>Sophie Yacoub |

366 The funders had no role in study design, data collection and interpretation, or the decision to submit the  
367 work for publication.

368 **Author contributions**

369 Nguyen Lam Vuong: Conceptualization, Methodology, Software, Formal analysis, Data curation, Writing-  
370 original draft, Writing-review & editing, Visualization

371 Nguyen Than Ha Quyen: Investigation, Resources, Writing-review & editing

372 Nguyen Thi Hanh Tien: Investigation, Resources, Writing-review & editing

373 Duong Thi Hue Kien: Investigation, Resources, Writing-review & editing

374 Huynh Thi Le Duyen: Investigation, Resources, Writing-review & editing

375 Phung Khanh Lam: Methodology, Investigation, Resources, Data curation, Writing-review & editing,  
376 Supervision

377 Dong Thi Hoai Tam: Conceptualization, Investigation, Resources, Writing-review & editing

378 Tran Van Ngoc: Conceptualization, Investigation, Resources, Writing-review & editing

379 Thomas Jaenisch: Conceptualization, Methodology, Investigation, Writing-review & editing, Funding  
380 acquisition

381 Cameron P. Simmons: Conceptualization, Methodology, Investigation, Writing-review & editing, Funding  
382 acquisition

383 Sophie Yacoub: Conceptualization, Methodology, Investigation, Writing-review & editing, Supervision,  
384 Funding acquisition

385 Bridget A. Wills: Conceptualization, Methodology, Investigation, Writing-review & editing, Supervision,  
386 Funding acquisition

387 Ronald B. Geskus: Conceptualization, Methodology, Investigation, Writing-review & editing, Supervision,  
388 Funding acquisition

389 **Ethics**

390 Human subjects: The studies and the blood sample analysis were approved by the Scientific and Ethics  
391 Committees of all study sites and by the Oxford Tropical Research Ethics Committee (OxTREC Ref No  
392 017-02; 012-05; and 502-18).

393

394 **References**

- 395 Balakrishna Pillai, A. K., Chu, J. J. H., Mariappan, V., & JeanPierre, A. R. (2021). Platelets in the  
396 pathogenesis of flavivirus disease. *Curr Opin Virol*, 52, 220-228.  
397 doi:10.1016/j.coviro.2021.12.007
- 398 Bates, D., Maechler, M., Bolker, B., & Walker, S. (2015). Fitting Linear Mixed-Effects Models Using lme4.  
399 *Journal of Statistical Software*, 67(1), 1-48. doi:10.18637/jss.v067.i01
- 400 Ben-Shachar, R., Schmidler, S., & Koelle, K. (2016). Drivers of Inter-individual Variation in Dengue Viral  
401 Load Dynamics. *PLoS Comput Biol*, 12(11), e1005194. doi:10.1371/journal.pcbi.1005194
- 402 Cattarino, L., Rodriguez-Barraquer, I., Imai, N., Cummings, D. A. T., & Ferguson, N. M. (2020). Mapping  
403 global variation in dengue transmission intensity. *Sci Transl Med*, 12(528).  
404 doi:10.1126/scitranslmed.aax4144
- 405 Clapham, H. E., Rodriguez-Barraquer, I., Azman, A. S., Althouse, B. M., Salje, H., Gibbons, R. V., . . .  
406 Cummings, D. A. (2016). Dengue Virus (DENV) Neutralizing Antibody Kinetics in Children After  
407 Symptomatic Primary and Postprimary DENV Infection. *J Infect Dis*, 213(9), 1428-1435.  
408 doi:10.1093/infdis/jiv759
- 409 Clapham, H. E., Tricou, V., Van Vinh Chau, N., Simmons, C. P., & Ferguson, N. M. (2014). Within-host viral  
410 dynamics of dengue serotype 1 infection. *J R Soc Interface*, 11(96). doi:10.1098/rsif.2014.0094
- 411 Duyen, H. T., Ngoc, T. V., Ha do, T., Hang, V. T., Kieu, N. T., Young, P. R., . . . Wills, B. A. (2011). Kinetics of  
412 plasma viremia and soluble nonstructural protein 1 concentrations in dengue: differential  
413 effects according to serotype and immune status. *J Infect Dis*, 203(9), 1292-1300.  
414 doi:10.1093/infdis/jir014
- 415 Endy, T. P., Nisalak, A., Chunsuttitwat, S., Vaughn, D. W., Green, S., Ennis, F. A., . . . Libraty, D. H. (2004).  
416 Relationship of preexisting dengue virus (DV) neutralizing antibody levels to viremia and severity  
417 of disease in a prospective cohort study of DV infection in Thailand. *J Infect Dis*, 189(6), 990-  
418 1000. doi:10.1086/382280
- 419 Hadfield, J. D. (2010). MCMC Methods for Multi-Response Generalized Linear Mixed Models: The  
420 MCMCglmm R Package. *Journal of Statistical Software*, 33(2), 1 - 22. doi:10.18637/jss.v033.i02
- 421 Halekoh, U., Højsgaard, S., & Yan, J. (2006). The R Package geepack for Generalized Estimating  
422 Equations. *Journal of Statistical Software*, 15/2, 1-11.

- 423 Harrell Jr, F. E. (2021). rms: Regression Modeling Strategies. R package version 6.2-0. Retrieved from  
424 <https://CRAN.R-project.org/package=rms>
- 425 Hue, K. D., Tuan, T. V., Thi, H. T., Bich, C. T., Anh, H. H., Wills, B. A., & Simmons, C. P. (2011). Validation of  
426 an internally controlled one-step real-time multiplex RT-PCR assay for the detection and  
427 quantitation of dengue virus RNA in plasma. *J Virol Methods*, *177*(2), 168-173.  
428 doi:10.1016/j.jviromet.2011.08.002
- 429 Jaenisch, T., Tam, D. T., Kieu, N. T., Van Ngoc, T., Nam, N. T., Van Kinh, N., . . . Wills, B. (2016). Clinical  
430 evaluation of dengue and identification of risk factors for severe disease: protocol for a  
431 multicentre study in 8 countries. *BMC Infect Dis*, *16*, 120. doi:10.1186/s12879-016-1440-3
- 432 Kariyawasam, R., Lachman, M., Mansuri, S., Chakrabarti, S., & Boggild, A. K. (2023). A dengue vaccine  
433 whirlwind update. *Ther Adv Infect Dis*, *10*, 20499361231167274.  
434 doi:10.1177/20499361231167274
- 435 Matangkasombut, P., Manopwisedjaroen, K., Pitabut, N., Thaloengsok, S., Suraamornkul, S.,  
436 Yingtaweesak, T., . . . Singhasivanon, P. (2020). Dengue viremia kinetics in asymptomatic and  
437 symptomatic infection. *Int J Infect Dis*, *101*, 90-97. doi:10.1016/j.ijid.2020.09.1446
- 438 Morsy, S., Hashan, M. R., Hieu, T. H., Mohammed, A. T., Elawady, S. S., Ghosh, P., . . . Huy, N. T. (2020).  
439 The association between dengue viremia kinetics and dengue severity: A systemic review and  
440 meta-analysis. *Rev Med Virol*, *30*(6), 1-10. doi:10.1002/rmv.2121
- 441 Nguyet, M. N., Duong, T. H., Trung, V. T., Nguyen, T. H., Tran, C. N., Long, V. T., . . . Simmons, C. P. (2013).  
442 Host and viral features of human dengue cases shape the population of infected and infectious  
443 *Aedes aegypti* mosquitoes. *Proc Natl Acad Sci U S A*, *110*(22), 9072-9077.  
444 doi:10.1073/pnas.1303395110
- 445 Quirino-Teixeira, A. C., Andrade, F. B., Pinheiro, M. B. M., Rozini, S. V., & Hottz, E. D. (2021). Platelets in  
446 dengue infection: more than a numbers game. *Platelets*, 1-8.  
447 doi:10.1080/09537104.2021.1921722
- 448 R Core Team. (2021). A language and environment for statistical computing. Retrieved from R  
449 Foundation for Statistical Computing, Vienna, Austria. <https://www.R-project.org/>
- 450 Redoni, M., Yacoub, S., Rivino, L., Giacobbe, D. R., Luzzati, R., & Di Bella, S. (2020). Dengue: Status of  
451 current and under-development vaccines. *Rev Med Virol*, *30*(4), e2101. doi:10.1002/rmv.2101

- 452 Simmons, C. P., Chau, T. N., Thuy, T. T., Tuan, N. M., Hoang, D. M., Thien, N. T., . . . Farrar, J. (2007).  
453 Maternal antibody and viral factors in the pathogenesis of dengue virus in infants. *J Infect Dis*,  
454 *196*(3), 416-424. doi:10.1086/519170
- 455 Simmons, C. P., Popper, S., Dolocek, C., Chau, T. N., Griffiths, M., Dung, N. T., . . . Farrar, J. (2007).  
456 Patterns of host genome-wide gene transcript abundance in the peripheral blood of patients  
457 with acute dengue hemorrhagic fever. *J Infect Dis*, *195*(8), 1097-1107. doi:10.1086/512162
- 458 Tang, Y., Kou, Z., Zhang, F., Yao, X., Liu, S., Ma, J., . . . Jin, X. (2010). Both viremia and cytokine levels  
459 associate with the lack of severe disease in secondary dengue 1 infection among adult Chinese  
460 patients. *PLoS One*, *5*(12), e15631. doi:10.1371/journal.pone.0015631
- 461 Tomashek, K. M., Wills, B., See Lum, L. C., Thomas, L., Durbin, A., Leo, Y. S., . . . Gubler, D. J. (2018).  
462 Development of standard clinical endpoints for use in dengue interventional trials. *PLoS Negl*  
463 *Trop Dis*, *12*(10), e0006497. doi:10.1371/journal.pntd.0006497
- 464 Tricou, V., Minh, N. N., Farrar, J., Tran, H. T., & Simmons, C. P. (2011). Kinetics of viremia and NS1  
465 antigenemia are shaped by immune status and virus serotype in adults with dengue. *PLoS Negl*  
466 *Trop Dis*, *5*(9), e1309. doi:10.1371/journal.pntd.0001309
- 467 van Houwelingen, H., & Putter, H. (2011). *Dynamic prediction in clinical survival analysis*: CRC Press.
- 468 Vaughn, D. W., Green, S., Kalayanarooj, S., Innis, B. L., Nimmannitya, S., Suntayakorn, S., . . . Nisalak, A.  
469 (2000). Dengue viremia titer, antibody response pattern, and virus serotype correlate with  
470 disease severity. *J Infect Dis*, *181*(1), 2-9. doi:10.1086/315215
- 471 Vuong, N. L., Quyen, N. T. H., Tien, N. T. H., Tuan, N. M., Kien, D. T. H., Lam, P. K., . . . Wills, B. A. (2021).  
472 Higher Plasma Viremia in the Febrile Phase Is Associated With Adverse Dengue Outcomes  
473 Irrespective of Infecting Serotype or Host Immune Status: An Analysis of 5642 Vietnamese  
474 Cases. *Clin Infect Dis*, *72*(12), e1074-e1083. doi:10.1093/cid/ciaa1840
- 475 Whitehorn, J., & Yacoub, S. (2019). Global warming and arboviral infections. *Clin Med (Lond)*, *19*(2), 149-  
476 152. doi:10.7861/clinmedicine.19-2-149
- 477 World Health Organization. (2009). *Dengue: guidelines for diagnosis, treatment, prevention and control*:  
478 World Health Organization.
- 479 World Health Organization. (2020). Ten threats to global health in 2019. Retrieved from  
480 <https://www.who.int/news-room/spotlight/ten-threats-to-global-health-in-2019>

481 Yacoub, S., Kotit, S., & Yacoub, M. H. (2011). Disease appearance and evolution against a background of  
482 climate change and reduced resources. *Philos Trans A Math Phys Eng Sci*, 369(1942), 1719-1729.  
483 doi:10.1098/rsta.2011.0013  
484
